# Supplementary material
Source: PubMed Central journal article supplement (PMC9811611)
Supplement: NIHMS1848470-supplement-Appendix.pdf [file NIHMS1848470-supplement-Appendix.pdf]

**Appendix**  
**Changes in E-cigarette Use Behaviors and Dependence in Long-Term E-cigarette Users**  
**Du et al.**

**Appendix Table 1.** Characteristics of All Study Subjects

| Characteristics                                                          | All study subjects (N=494) |             |                              |
|--------------------------------------------------------------------------|----------------------------|-------------|------------------------------|
|                                                                          | Baseline                   | Follow-up   | <i>p</i> -value <sup>a</sup> |
| Age, years, mean (SD)                                                    | 40.7 (12.0)                | 44.4 (12.1) | –                            |
| Male, n (%)                                                              | 327 (66.2)                 |             | –                            |
| White, n (%)                                                             | 443 (90.4)                 |             | –                            |
| College or higher, n (%)                                                 | 229 (46.4)                 | 238 (48.2)  | 0.23                         |
| Full-time employed, n (%)                                                | 331 (67.0)                 | 327 (66.2)  | 0.69                         |
| Income >\$2,500/month, n (%)                                             | NA                         | 304 (62.7)  | –                            |
| E-cigarette use behaviors                                                |                            |             |                              |
| The most important reason to use an e-cigarette, n (%)                   |                            |             |                              |
| Less harmful to my health                                                | 178 (36.1)                 | 180 (36.4)  | 0.94                         |
| To quit smoking or avoid relapsing                                       | 153 (31.0)                 | 155 (31.4)  | 0.88                         |
| Mean number of devices used prior to the current device (SD)             | 4.5 (5.5)                  | 10.2 (12.8) | <b>&lt;0.0001</b>            |
| Mean nicotine concentration of preferred liquid (in mg/ml) (SD)          | NA                         | 8.0 (8.1)   | –                            |
| Non-nicotine-containing preferred liquid, n (%)                          | NA                         | 26 (5.3)    | –                            |
| Use more than one nicotine level, n (%)                                  | NA                         | 74 (15.0)   | –                            |
| Mean number of different nicotine levels used on a regular basis (SD)    | NA                         | 2.3 (0.6)   | –                            |
| Mean amount of e-liquid used per day (in ml) (SD)                        | NA                         | 7.6 (6.9)   | –                            |
| Daily e-cigarette use in the past 28 days or 30 days, <sup>b</sup> n (%) | 424 (85.8)                 | 441 (89.3)  | –                            |
| E-cigarette-related dependence                                           |                            |             |                              |
| Mean PSECDI (SD)                                                         | 8.4 (3.5)                  | 8.3 (3.9)   | 0.50                         |
| Mean e-cigarette use times per day (SD)                                  | 23.2 (24.8)                | 21.0 (23.8) | 0.09                         |
| Mean time to first e-cigarette use after waking (in minutes) (SD)        | 49.6 (90.1)                | 46.1 (82.6) | 0.45                         |
| Awaken at night to use e-cigarette, n (%)                                | 36 (7.3)                   | 50 (10.2)   | <b>0.048</b>                 |
| Mean number of nights per week awakened to use e-cigarette (SD)          | 0.3 (1.2)                  | 0.4 (1.3)   | 0.17                         |
| Hard to quit e-cigarette, n (%)                                          | 161 (32.7)                 | 101 (20.5)  | <b>&lt;0.0001</b>            |
| Have had strong cravings to use e-cigarette, n (%)                       | 209 (42.5)                 | 224 (45.5)  | 0.23                         |
| Strong urges to use e-cigarette, n (%)                                   | 74 (15.0)                  | 74 (15.0)   | 1.00                         |
| Hard to keep from using e-cigarette, n (%)                               | 62 (12.6)                  | 78 (15.8)   | 0.11                         |
| Felt irritable if couldn't use e-cigarette, n (%)                        | 160 (32.4)                 | 150 (30.4)  | 0.43                         |
| Felt nervous/restless/anxious if couldn't use e-cigarette, n (%)         | 166 (33.6)                 | 164 (33.2)  | 0.87                         |

*Note:* Subjects with complete data on e-cigarette use and e-cigarette-related dependence were included. Boldface indicates statistical significance ( $p < 0.05$ ).

<sup>a</sup>Paired *t*-test or McNemar's test *p*-values were used to examine changes in characteristics between baseline and follow-up.

<sup>b</sup>In the baseline survey subjects were asked to report the number of e-cigarette-use days in the past 28 days; in the follow-up survey subjects were asked to report the number of e-cigarette-use days in the past 30 days.

NA, the questions were not comparable in the baseline survey; PSECDI, Penn State Electronic Cigarette Dependence Index.
